# Supplementary material for: Effect of Parylene C on the Corrosion Resistance of Bioresorbable Cardiovascular Stents Made of Magnesium Alloy ‘Original ZM10’
Source: MDPI journal article supplement (doi:10.3390/ma15093132), 2022-04-26
Supplement: s1 [file s1]

## Supporting Information

# Effect of Parylene C on the Corrosion Resistance of Bioresorbable Cardiovascular Stents Made of Magnesium Alloy ‘Original ZM10’

Makoto Sasaki <sup>1,\*</sup>, Wei Xu <sup>1,\*</sup>, Yuki Koga <sup>2</sup>, Yuki Okazawa <sup>3</sup>, Akira Wada <sup>2</sup>, Ichiro Shimizu <sup>4</sup> and Takuro Niidome <sup>1</sup>

<sup>1</sup> Faculty of Advanced Science and Technology, Kumamoto University, Kumamoto 860-8555, Japan; niidome@kumamoto-u.ac.jp

<sup>2</sup> Japan Medical Device Technology, Co., Ltd., Kumamoto 861-2202, Japan; a.wada@jmdt.co.jp (A.W.); y.koga@jmdt.co.jp (Y.K.)

<sup>3</sup> Fuji Light Metal, Co., Ltd., Kumamoto 869-0192, Japan; yuuki-okazawa@fujisash.net

<sup>4</sup> Department of Mechanical Engineering, Okayama University of Science, Okayama 700-0005, Japan; shimizu@mech.ous.ac.jp

\* Correspondence: sasakimakoto@kumamoto-u.ac.jp (M.S.); xuwei@kumamoto-u.ac.jp (W.X.); Tel.: +81-96-342-3288 (M.S.); +81-96-342-3668 (W.X.)

**Table S1.** Elemental composition (wt.%) of Original ZM10.

| Alloying<br>Elements<br>[wt.%] | Mg      | Al | Zn   | Zr   | Mn    | Rare Earth |    |    |    |
|--------------------------------|---------|----|------|------|-------|------------|----|----|----|
|                                |         |    |      |      |       | Y          | Dy | Nd | Gd |
| Original ZM10                  | Balance | –  | 1.45 | 0.14 | ≤0.20 | –          | –  | –  | –  |

**Table S2.** Specifications of the stent used in this study.

|                       |                                    |
|-----------------------|------------------------------------|
| Material              | Original ZM10                      |
| Strut width (μm)      | 116~150                            |
| Strut thickness (μm)  | 110                                |
| Crossing profile (mm) | 1.2–1.3                            |
| Drug dose             | 1.0 μg/mm <sup>2</sup> (Sirolimus) |

**Table S3.** Mg ion release (%) from Mg alloy stents after balloon expansion.

| Mg ion release<br>[%] | bare     | HF       | HF/parylene C | HF/polymer | HF/parylene C/polymer |
|-----------------------|----------|----------|---------------|------------|-----------------------|
| 1 month               | 38.1±4.9 | 12.8±0.9 | 0.1±0.01      | 8.7±1.0    | 0.2±0.2               |
| 2 months              | –        | 38.1±9.7 | 0.1±0.01      | –          | –                     |
| 3 months              | –        | 60.6±7.7 | 0.2±0.01      | –          | –                     |
| 4 months              | –        | 74.1±6.4 | 0.2±0.01      | –          | –                     |
| 5 months              | –        | 77.4±2.4 | 0.2±0.01      | –          | –                     |
| 6 months              | –        | 78.3±0.1 | 0.2±0.01      | –          | –                     |

The data represent the mean value for n = 5 with the standard deviations of the means.

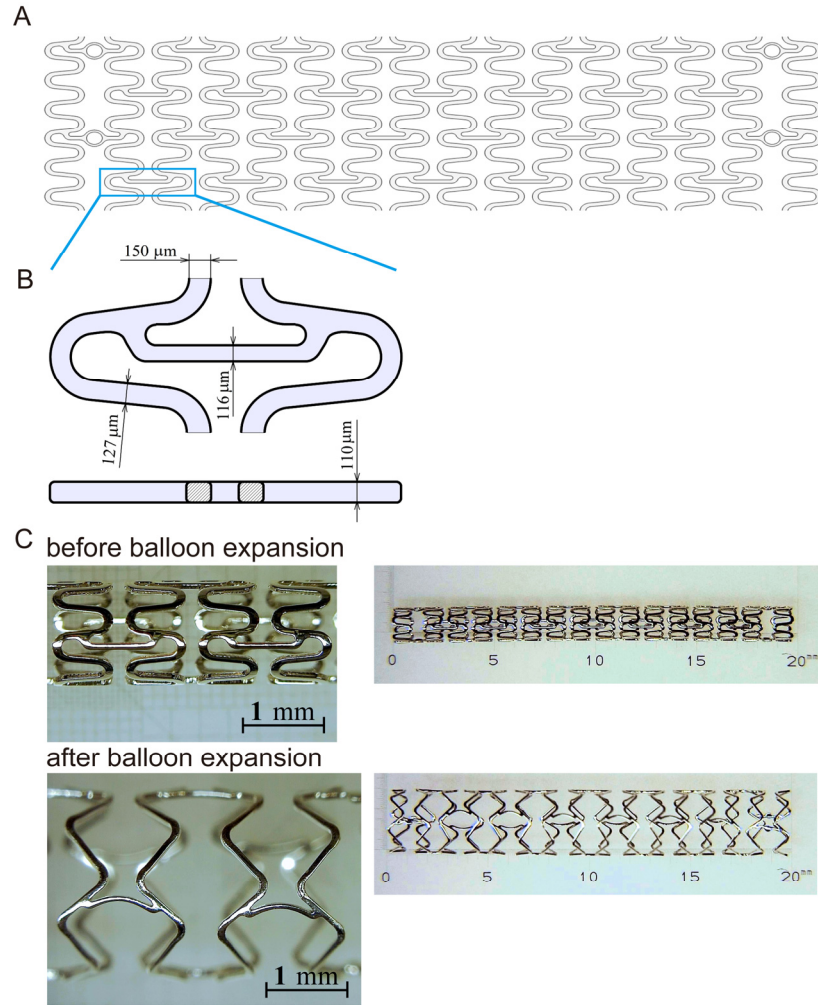

**Figure S1.** Structure of the Mg alloy stent,  $3.0 \times 20$  mm with six-crown two-link design and square-shaped struts. (A) Developed structure of the stent. (B) Structure of one unit of the stent. (C) Microscopy images of the stent before (upper) and after (lower) balloon expansion.
